# Supplementary material for: TAPBPR alters MHC class I peptide presentation by functioning as a peptide exchange catalyst
Source: eLife journal article supplement (doi:10.7554/elife.09617), 2015-10-06
Supplement: supp [file elife_poa_e09617_Figure_6_source_data_1.xlsx]

## Sheet: Sheet1
KBM7			KBM7 Tapasin KO			KBM7 TAPBPR KD
Sequence	Protein Group Accessions		Sequence	Protein Group Accessions		Sequence	Protein Group Accessions
ALADGVQKV	O14791		VDEVGGEALGRL	P68871		KLMDLDVEQL	P12004
SVSTVLTSKYR	P69905		VDEVGGEALGR	P68871		ALMDEVVKA	P00558
SLLDKIIGA	Q6NZI2		DEVGGEALGRL	P68871		ALAAALAHI	Q9BQ39
EEEEEEEEE	P46060		FLALLAGAHA	P55058		VLDDKLVFV	Q4KMQ2
ILDQKINEV	P11926		GEYGAEALERm	P69905		ALAEIAKAEL	P23246
ImLEALERV	A8MWD9		ALVVQVAEA	P07686		FVDDYTVRV	O00487
NALAHKYH	P68871		VGGEALGRL	P68871		ALADGVQKV	O14791
ILTDITKGV	P13639		VLSSRLAFA	P79483		ILTDITKGV	P13639
TLYEAVREV	P62906		TPEEKSAVTAL	P68871		SLQDEIQRV	Q9UNX4
VIAEILRGV	O00567		NVDEVGGEALGR	P68871		FLALLAGAHA	P55058
AIVDKVPSV	Q9Y678		DEVGGEALGR	P68871		VLFENTDSVHL	P42696
SLLSELQHA	Q96PP8		VHLTPEEKSAV	P68871		TLAEIAKVEL	Q15233
ALLDKLYAL	Q9NV31		SDGLAHLDNLKG	P68871		FLNGEVIRL	Q99714
ALAEIAKAEL	P23246		YGAEALERm	P69905		RLNEKNYEL	Q9UI12
VMDSKIVQV	O15131		ASSPGGVYATR	P08670		GIFGGHIRSV	Q14694
TLAEIAKVEL	Q15233		ALADGVQKV	O14791		ILQNKIDLV	P41091
FLSELTQQL	P14174		ILTDITKGV	P13639		ALYDNVEKL	P08243
VLIDYQRNV	O14980		PEPAKSAPAPK	O60814		VMDSKIVQV	O15131
KLLEPVLLL	P62249		ILDQKINEV	P11926		KLmDLDVEQL	P12004
KLQEFLQTL	Q9NVI1		VLSPADKTNVK	P69905		IMLEALERV	A8MWD9
NLAENISRV	P11217		LLAAWTARA	P05067		LLIENVASL	P07203
YLLPAIVHI	P17844		FGGPGTASRPS	P08670		LLYDLADQLHA	P13804
SLAQYLINV	Q15366		VLSPADKTNV	P69905		GLDVDGIYRV	Q53QZ3
VLDDKLVFV	Q4KMQ2		KLSDLQTQL	P19387		ALLDRIVSV	Q92621
KVIEINPYL	P28074		VMDSKIVQV	O15131		GLDPSGARLV	Q9NW82
TLFDYEVRL	Q96T88		ALNEQIARL	O14777		ALmDEVVKA	P00558
FESFGDLSTPDA	P68871		ANVGAGKKPKE	P62847		LSLENLEKI	Q9Y2H2
GLIDKVNEL	P61011		LLLDVPTAAVQA	P13284		KLIAQNLEL	P52732
WLAEKLPTL	Q14008		SDGLAHLDNL	P68871		TLVYHVVGV	Q15393
YLDPAQRGV	Q96S19		VLLKARLVPA	Q6P995		SLLDKIIGA	Q6NZI2
RVSDINFTL	Q5H9R7		KNLQTVNVDEN	P62899		KLSDLQTQL	P19387
SVSTVLTSKY	P69905		NLSKEDDVR	P62753		ImLEALERV	A8MWD9
VDEVGGEALGRL	P68871		LSFPTTKTYF	P69905		SLLSELQHA	Q96PP8
VVYPWTQRF	P68871		VLSPADKTNVKA	P69905		ILMEHIHKL	P84098
FLNGEVIRL	Q99714		SLVSKGTLVQTK	P16402;P10412		VIAEILRGV	O00567
KIYEGQVEV	P46777		GNFGGSRNMGGP	P22626		TLADVLYHV	Q9UBL3
ILQNKIDLV	P41091		KVVNPTQK	P01009		NmVAKVDEV	P62906
KLMDLDVEQL	P12004		SDGLAHLDNLK	P68871		ALLDKLYAL	Q9NV31
LLIENVASL	P07203		SYVTTSTRTY	P08670		KILDLETQL	Q5BJF6
KESTLHLVL	P0CG48		PDPAKSAPAPK	P23527		AIVDKVPSV	Q9Y678
GNPKVKAH	P68871		LSADKALLQ	Q8NDA2		RLIEQEEYL	Q9NTJ3
ALATLIHQV	Q9UBW8		GVANALAHK	P68871		ALKDLINEA	P12004
ALVVQVAEA	P07686		KIYEGQVEV	P46777		NIIELVHQV	P43405
GLADKVYFL	P27708		GLIDKVNEL	P61011		ILQDRLNQV	Q99741
FLLDKKIGV	P78371		GLDAGLHQL	Q9Y240		FLYSDEVQI	Q9H0C5
KLSDLQTQL	P19387		GGPGTASRP	P08670		VILEGELERA	P67936
GEVDVEQHTL	O95067		GGNFGGRSSGP	Q32P51		KLLPQLTYL	P39687
KLSEIDVAL	Q9BUP0		VLIDYQRNV	O14980		ILDQKINEV	P11926
ALKDLINEA	P12004		VLSPADKTN	P69905		ALSNLEVKL	Q86UX7
VLSPADKTNVK	P69905		ImLEALERV	A8MWD9		KMADIEYRL	P40937
TQAPTKASE	P47914		GAEALERm	P69905		ILYGEVEKL	Q9NZL9
GLDVDGIYRV	Q53QZ3		DVKFGADARA	P10809		GEVDVEQHTL	P14635
VIKAVDKKA	P68104		SDGLAHLDN	P68871		SLDQPTQTV	Q99613
GLQEGTHEL	O76094		SLLSELQHA	Q96PP8		ALATLIHQV	Q9UBW8
AIQDKLFQV	Q9BRQ6		VHLTPEEKSA	P68871		GLADKVYFL	P27708
FLIRESETL	P07948		LLGPRLVLA	P49755		TLFDYEVRL	Q96T88
GESDDSILRL	P63220		LLIENVASL	P07203		VmDSKIVQV	O15131
VIKAVDKKAAG	P68104		SVSTVLTSKYR	P69905		SLAQYLINV	Q15366
FLALLAGAHA	P55058		VQTKGTGASGSF	P16402;P10412		KLIDGQVIQL	P52747
ALNEQIARL	O14777		AKDVKFGADARA	P10809		SLAELVHAV	Q9Y6P5
VHLTPEEK	P68871		FVDDYTVRV	O00487		SLLENLEKI	O60812
KILDLETQL	Q5BJF6		DALTNAVAH	P69905		TLYEAVREV	P62906
VLSPADKT	P69905		LLLSGAARA	P24158		YLLPAIVHI	P17844
ALSALTARL	P04844		VmDSKIVQV	O15131		ALNEQIARL	O14777
NIIELVHQV	P43405		STVLTSKYR	P69905		FLDITNPKA	Q92890
TLADVLYHV	Q9UBL3		NLAENISRV	P11217		VLIDYQRNV	O14980
GLKEGIPAL	P13639		GKADGAEAKPAE	P35579		ALQEMVHQV	Q14511
ALYDNVEKL	P08243		SLDFSGAGQRL	Q8N729		ALVQDLAKA	P14635
YLTNEGIQYL	P46783		VHLTPEEK	P68871		KLQEFLQTL	Q9NVI1
RLPEAIEEV	Q9UBQ7		HLTPEEKS	P68871		RLWGEPVNL	O00507
LSLENLEKI	Q9Y2H2		VLSPADKT	P69905		RLAVYIDKV	P20700
KILPTLEAV	Q12905		VHLTPEEKS	P68871		ILDEHVQRV	O15169
AEITDKLGL	P61204		HLTPEEKSA	P68871		FLLEGIRSL	P55160
ILDKKVEKV	Q58FF7		AHVDDmPNAL	P69905		VLMTEDIKL	Q04637
SLQDEIQRV	Q9UNX4		KVAGAATPK	P16402		FLYDDNQRV	P11388
KNLQTVNVDEN	P62899		EVGGEALGRL	P68871		RMLDSVEKL	P55160
ILMEHIHKL	P84098		HLTPEEKSAV	P68871		ILLQQQQQL	Q7Z5L9
SIIGRLLEV	P62136		YLDPAQRGV	Q96S19		NLAENISRV	P11217
DALTNAVAHVD	P69905		VSTVLTSKYR	P69905		ALPDQGIAKA	P78318
SLLEKSLGL	O43324		GLSNHIAAL	Q6PL18		KLDQDLNEV	Q9UQE7
FVDDYTVRV	O00487		QLDDLKVEL	P42766		KLSEIDVAL	Q9BUP0
KILEDVVGV	Q9ULW0		GLDVDGIYRV	Q53QZ3		ILmEHIHKL	P84098
AAAAAGTPRL	Q5BJH7		GGPGTASRPSSS	P08670		KLQELNYNL	P42224
RLQEDPPVGV	P63146		LMAHMASKE	P04406		RVPPPPQSV	P29353
FLYDDNQRV	P11388		ALVQDLAKA	P14635		ALDSQVPKV	Q5JSP0
ALAEEVEQV	Q9BQE5		VLQQHLETL	Q9NP66		WLAEKLPTL	Q14008
LLKNLENLV	Q96PN6		HLTPEEKSAVTA	P68871		KLIDDVHRL	P08240
GLIDGAVVSGI	Q8IZQ1		FGGPGTASRPSS	P08670		KIYEGQVEV	P46777
KLmDLDVEQL	P12004		FEQYGKIE	Q32P51		KVLGIVVGV	A5YKK6
QMELTIKDLE	A2RUR9		TTVGPASSSPKI	Q8IVL1		YLDPAQRGV	Q96S19
RIIDVVYNA	P62241		PEPAKSAPAP	O60814		FLIRESETL	P07948
FVQmmTAK	P62158		GLKEGIPAL	P13639		YmAELIERL	O75496
ILDPHVVLL	Q99567		FDLSHGSAQV	P69905		ILSEVQQAV	P09874
ALSNLEVKL	Q86UX7		SLSEKTVLL	P13987		PEPAKSAPAPK	O60814
GELGNGNIKL	P12004		ALDTRVVEL	Q9Y240		SIIGRLLEV	P62136
IMLEALERV	A8MWD9		ILDKKVEKV	Q58FF7		KLHDINAQL	Q10567
KLQELNYNL	P42224		AVIDVGINRV	P13995		KIFDEILVNA	P11388
TLKDLDVAL	Q17R31		YVTTSTRTY	P08670		KIADFGWSV	Q96GD4
SILEHQIQV	P33991		RLDETIQAI	Q15650		FLDNAImIV	Q6PI78
ILLPEPSIRSV	P25098		ILAQEIVKA	Q9UBE0		QLVDIIEKV	P61289
RLQEDPPAGV	P49459		LLDVVHPAA	Q99832		YLTNEGIQYL	P46783
QLVDIIEKV	P61289		FLYDDNQRV	P11388		AILEKVFTA	Q6ZMG9
LLLDVPTAAVQA	P13284		ALAEIAKAEL	P23246		ILTEAIKAA	Q99575
SLLENIAKA	Q93074		RLYQGINQL	P43246		AIQDKLFQV	Q9BRQ6
RLIQESPTL	Q6P1A2		AEPAVQRT	P14209		KLFEGENEHL	Q13576
VLSPADKTNVKA	P69905		VDPVNFKL	P69905		SLLEKSLGL	O43324
KLGEIVTTI	P61204		EAGALERm	Q8TEY5		KLLEPVLLL	P62249
AILEKVFTA	Q6ZMG9		FAGDDAPRA	P60709		KLYDIDVAKV	P62750
FLSEHPNVTL	Q9UH17		KMVGDVTGA	P13164		VLmTEDIKL	Q04637
SLIDKTTAA	P09234		ALKDLINEA	P12004		KVIEINPYL	P28074
KLGSVPVTV	Q9Y4C2		AIVDKVPSV	Q9Y678		KLLEVNGVAL	Q14160
ARAELNDKV	P35749		VDDmPNALSAL	P69905		ILAAVETRL	Q9NVF7
SLFGGSVKL	Q8WUM4		AHVDDmPNA	P69905		YLHDQNPDAAL	O14579
TVADKIHSV	O95147		VLmTEDIKL	Q04637		KMVGDVTGA	P13164
KTSISPLNVVQG	Q58F21		VNFTVDQIRA	P13639		KQYGNEVFL	P50990
ALMDEVVKA	P00558		RNDEELNK	Q96KK5		LLDEEISRV	Q96PU8
WIGAEGLSVRR	A2VEC9		ALSGLAVRL	Q96HG1		NLYPFVKTV	P31939
GLATDVQTV	P49720		ALDANIARL	Q49A88		SMYGVDLHHA	Q9H4G0
TPPVQAAYQK	P68871		TEAPLNPKAN	P60709		SLAGDVALQQL	Q15021
LLDRFLATV	Q14094		KQYGNEVFL	P50990		KLLDVVHPA	Q99832
RVIGTLEEV	P46060		FLNGEVIRL	Q99714		FLSELTQQL	P14174
ALSDHHIYL	P04075		RVAPEEHPV	P60709		GLADASLLKKV	Q9UBB4
ALNEEAGRLLL	Q16763		TLYEAVREV	P62906		FLFGEVHKA	Q7L590
SKDPADETEAD	P16949		ALNEKLVNL	O00303		RVLPPSALQSV	Q96GD4
NmVAKVDEV	P62906		GVGPVPARA	Q8TB96		KNLQTVNVDEN	P62899
MTKLMNRLL	Q96K12		PAVHASLDKF	P69905		RLQEDPPAGV	P49459
VEIENPETSDQ	P02724		TSREIQTAV	O60814;P23527		ALYDEVRTV	A6NHR9
ALAAALAHI	Q9BQ39		KLGEIVTTI	P18085		RVSDINFTL	Q5H9R7
VASFPKKQE	P14406		KLGSVPVTV	Q9Y4C2		LLLDMQNRL	Q16531
LLDKVADNLA	Q12906		HLDNLKGT	P68871		RLQEEINEV	Q70UQ0
FLDNAImIV	Q6PI78		SLADIAQKL	O43242		ALLDIIRSL	O95864
DFIAAQIKTL	Q9Y4A5		ILYGEVEKL	Q9NZL9		ALWEDEGVRA	P63092
ALVDHVAEL	B0I1T2		EVGGEALGR	P68871		HLTDITLKV	Q15046
FLDPNNIPKA	Q9BVK2		KTIETSPSL	Q9NVI1		KLYQRDLEV	Q96B01
AGKVTKSAQK	P68104		NELRVAPEEHPV	P60709		HLANIVERV	Q8IYM9
AAKVPAKK	P50914		ILSGVVTKm	P62280		RLYQGINQL	P43246
GLNEEIARV	O14777		TLAEIAKVEL	Q15233		RVADYIVKV	Q96EP9
KIFDEILVNA	P11388		KLLEPVLLL	P62249		KImEQSPDm	P35716
ILHDDEVTV	P05386		GKVNVDEV	P68871		GLVDEKALAQA	Q13363
SLSEKTVLL	P13987		GVLPNIQAV	Q96KK5		GLDDIKDLKV	Q9HCE1
NLLELFVQL	P42356		KIAPNTPQL	P69849		VQIEEVRQV	Q12905
AAAAATPAVR	Q9H361		RVIGTLEEV	P46060		YLLQEPPRTV	Q96IZ0
LLGPRLVLA	P49755		GGPGTASRPSS	P08670		KLNPQQFEV	P46977
ALIEKLVEL	Q14181		RLQESVMEA	O60216		NVIERLQEA	Q9UBK9
FAGDDAPR	P60709		TPEEKSAV	P68871		ALSEELVQL	P33176
TEVGEKIAL	P41091		GLIDGAVVSGI	Q8IZQ1		ALNEEAGRLLL	Q16763
QLDDLKVEL	P42766		KLDVGNAEV	P51572		KIMEQSPDm	P35716
DLAVDVEQV	Q9Y4G8		KLmDLDVEQL	P12004		ALDEVFTKV	Q9UMX5
GVLPNIQAV	Q96KK5		KATGAATPK	P10412		YLEEYKFQV	O14508
TLVYHVVGV	Q15393		TVADKIHSV	O95147		LILYYAFLME	O95424
ALmDEVVKA	P00558		RLPEAIEEV	Q9UBQ7		mAHMASKE	P04406
PGSLVLIIIL	Q9UHC9		HLTPEEKSAVT	P68871		KMPEGTFLV	Q9NSE2
TVSTVGISII	Q9Y4B6		LENDIKVEI	P54289		RVAPEEHPV	P60709
ILTDKLKE	A6NL28		VLDDKLVFV	Q4KMQ2		SLADLYFRA	Q9UJX3
ALNEKLVNL	O00303		AYQKVVAG	P68871		RLQEDPPVGV	P63146
LQYSVEVQV	Q8NDA2		mGNPKVKA	P68871		FLVQNIHTL	Q8TDN6
ALFQRPPLI	O60832		KVIEINPYL	P28074		DDHDPVDK	P22626
KVLGIVVGV	A5YKK6		TLKDLDVAL	Q17R31		FLYDTHQNL	P16885
EPEVLQVLE	Q6IQ55		YFEEYGKID	P22626		RLAEDVQRA	Q9Y6C2
KLDPTKTTL	Q92597		KILDLETQL	Q5BJF6		FLQEGDLISA	Q13868
AGAGKVTKS	P68104		RIIDVVYNA	P62241		VLYDQPRHV	Q93074
IQVTKVTQV	P48444		FSTAQHAS	P14866		ILDKIVQKV	Q8TCJ0
YAKVQGAV	Q9BUB5		DDHDPVDK	P22626		LLLDVPTAAVQA	P13284
VDYmTEFVI	Q14257		VIANEIEKV	Q9BPW4		LLFDQAYQm	Q6PL18
LLQNLTLQE	Q15345		SLIDKTTAA	P09234		RLQESVmEA	O60216
VSTVLTSKY	P69905		GGEALGRLLV	P68871		KLQDNLRQL	Q96HR3
ELTLPTPAAVAK	O14924		VEQLEKGSPG	P29474		VLWDRTFSL	P42224
GLIEKNIEL	P26358		FEEYGKID	P22626		KLFDRPQEL	Q5VZ89
LDEGRSILL	Q8N680		VSTVLTSKY	P69905		ALDTRVVEL	Q9Y240
RVADYIVKV	Q96EP9		SIKFHPSEQL	Q9Y2I8		RLVEIQYEL	Q14161
YLHDQNPDAAL	O14579		AVPPPPSSV	Q9NZI8		RLLDEEISRV	Q96PU8
GLGPPGRSV	Q68D10		SLQDEIQRV	Q9UNX4		ILDKKVEKV	P08238
FLDKLHNEI	Q9NWB7		ILHDDEVTV	P05386		KLFEKVKEV	Q96K12
ELTNITIAI	P01225		LTPEEKSAV	P68871		VHLTPEEKSAV	P68871
VIANEIEKV	Q9BPW4		NQFPGFKEV	P08579		FLLDGFPRTV	P54819
FLTKQEILL	Q99828		GLATDVQTV	P49720		KVIDEIYRV	Q9NVF7
			VLNPHEALA	O60895		IEQEKQAGES	P62328
			FDLSHGSA	P69905		AEPAVQRTLLE	P14209
			FLDPNNIPKA	Q9BVK2		SLNGLEVHL	Q9NQG7
			TAAANSLLIAL	P50406		GLIDKVNEL	P61011
			SGIREVKLTQGI	P28906		ALNEKLVNL	O00303
			PTTKTYFPHF	P69905		KLGSVPVTV	Q9Y4C2
			RVSDINFTL	Q5H9R7		VLQQHLETL	Q9NP66
			TImPKDIQL	Q6NXT2		RVIGTLEEV	P46060
			GLGPPGRSV	Q68D10		KILEDVVGV	Q9ULW0
			VAPEEHPVLL	P60709		TVADKIHSV	O95147
			VNMSLGLTLA	Q13349		SLLENIAKA	Q93074
			IMLEALERV	A8MWD9		GLLEGVRGV	Q8NG06
			KLSEIDVAL	Q9BUP0		KGGDAPAAGEDA	P62851
			RVADYIVKV	Q96EP9		VLTGLSIRL	Q6SPF0
			HAGEYGAEA	P69905		LSADKALLQ	Q8NDA2
			ALSALTARL	P04844		ALAEEVEQV	Q9BQE5
			SPADEKKG	P07197		RLYPEGLAQL	P61421
			KEAAEQDVEKK	P26373		RLLGLETNV	Q96DR7
			ADAPREPPP	Q13105		LLQESLAQA	Q9NX09
			KLNATNIEL	P28066		ALLKIEGVYA	P18077
			TLAVSAGAVL	Q8WVP7		VNFTVDQIRA	P13639
			ALYDNVEKL	P08243		IQVTKVTQV	P48444
			TVADHIQKV	Q9Y678		ALREENEQL	Q8IYR2
			TQLTGPVmPV	P26373		KLAENIDAQL	P37198
			IQRTPKIQ	P61769		NIVERVKEV	Q8IYM9
			SLLTSGLAKTT	Q8WXI7		LLKNLENLV	Q96PN6
			LLPPQPALA	P12821		KQVEEIFNL	P78347
			KLDPTKTTL	Q92597		SMLEDVQRA	Q9NW13
			ISLEGAQKL	Q8IYK4		LLAETHYQL	P49321
			CGSVDGVIK	P61916		KLMQQQQEV	O15164
			LDNLKGTFA	P68871		IQRTPKIQ	P61769
			FLIRESETL	P07948		KVLERVNAV	Q9UL46
			GVYGDVQRV	P26599		GVIDGHIYAV	Q14145
			VLSAAAAAGV	P51795		ILDPHVVLL	Q99567
			DKEVLASQLL	Q9H2M9		ILLDQTVRV	Q69YN4
			SLFGGSVKL	Q8WUM4		ALFPERITV	Q5SQI0
			ILSEFSSKL	Q8N3U4		ALSGLAVRL	Q96HG1
			AHAGEYGAEA	P69905		KLWEAESKL	Q9NYP9
			KLQELNYNL	P42224		KLDEHIAYL	Q2NKX8
			LDLSGARL	Q9UGY1		YLGDVSERV	P53621
			YLENGKETL	P30511		NmVDIIHSV	P05166
			VNVLILYYA	O95424		VLLGKVYVV	Q6TFL4
			ALGPTGRGV	O15270		KIIDFIYTA	Q9P2J3
			RLYGLGTGV	Q9UFF9		KLQDQIFNL	O43665
			SETGAGKHVPRA	Q9BQE3		ANVGAGKKPKE	P62847
			KILEDVVGV	Q9ULW0		FLLAEDTKV	O95347
						GVLPNIQAV	Q96KK5
						KIQEILTQV	O00425
						YAYDGKDYIA	P01889
						TLSDLRVYL	Q9BYN0
						SLLDIIEKV	P49815
						GLDAGLHQL	Q9Y240
						KLFQGQLVL	O94782
						LMAHMASKE	P04406
						ALFQRPPLI	O60832
						RLTDYISKV	O75915
						SILRGIFSV	Q96PP9
						ALIEDEHNL	Q49A88
						RLASYLDRV	P05783
						VLAASGILINT	Q96JQ5
						KEKYIDQEEL	P07900;P08238
						GNFGGSRNmGGP	P22626
						NLmDDIERA	P50990
						KISEVVELL	P52701
						ALTDFVRSV	O60888
						TLQEFLERI	Q9NSI8
						VIANEIEKV	Q9BPW4
						TLKDLDVAL	Q17R31
						GLDALKVTV	P52789
						NLMEQPIKV	P14923
						RLIQESPTL	Q6P1A2
						RLPEAIEEV	Q9UBQ7
						FLQPELVKL	Q14997
						KVMDEVEKA	Q9Y383
						FLTKQEILL	Q99828
						MAHMASKE	P04406
						FLLDKKIGV	P78371
						FEEYGKID	P22626
						KIMEQSPDM	P35716
						SmYGVDLHHA	Q9H4G0
						ALLGDLTKA	O14787
						ALNELLQHV	Q9Y490
						ILEKKVEKV	P07900
						ILSEFSSKL	Q8N3U4
						VLDSEALRI	Q9NVH1
						RLLEQKVEL	Q9H307
						GGNFGGRSSGP	Q32P51
						TQILSVPKV	P42166
						VLYHVETEV	Q9UBL3
						NMVDIIHSV	P05166
						ALVVQVAEA	P07686
						GLSNHIAAL	Q6PL18
						KMDEVLYSI	P83876
						FTLRDLETL	Q9H1A4
						YLINEIDRI	Q03001
						KLYEEINQV	Q6UW02
						YLDPNQRDL	Q86YE8
						KLSEIPLTL	Q9UIG0
						ALVDHVAEL	B0I1T2
						AHESVVKSED	P13073
						SLLQTLYKV	P46060
						KLFGETTLV	P50748
						ALSALTARL	P04844
						YLVAEKVTV	P07900
						QLDDLKVEL	P42766
						LLKDGPLYR	Q92794
						TVADHIQKV	Q9Y678
						RLAQHITYV	P33993
						GLYYEEVRL	O15050
						VLTNKLLTV	P37287
						FLDPNNIPKA	Q9BVK2
						KLGEIVTTI	P61204
						KILQELPSV	Q96ST2
						YAFNMKATV	P11142
						VDDTQFVR	P01889
						RIIDVVYNA	P62241
						DIVmTQTPLSL	P01614
						KLDVGNAEV	P51572
						AmPPPPPQGV	O60216
						ILFGHENRV	O14775
						TLADLVHHV	Q9Y4A5
						AMAASPHAV	Q13151
						KLLDRETIS	Q14517
						VLYENALKL	Q9Y613
						GLSTEGIYRV	Q9NRY4
						KmADIEYRL	P40937
						KLQELENRL	Q8WXH0
						LLDRFLATV	Q14094
						VLDDSTAKL	Q9P219
						YMIAHITGL	P04818
						VQLEDIRNL	Q9Y5S1
						NLAEKLIGV	Q86X10
						QmQQALEQ	Q9ULE4
						RLLQEQHQL	Q63HN8
						SLLDVAVHm	O96006
						VLSPADKTNV	P69905
						VLLKARLVPA	Q6P995
						FLGEKIASV	Q8N128
						SLSEKTVLL	P13987
						VLQGKLAEV	Q9UPN3
						SLAQYLINA	Q15365
						IVAESLQQV	P42224
						GLIEKNIEL	P26358
						LLQEVEHQL	O94972
						SLAEEHEGL	Q10570
						NVEWAKPSTN	O75821
						FLAKLIAQA	P50990
						SLLDEFYKL	Q14444
						GEVDPKVAL	P17568
						KILPTLEAV	Q12905
						FLKDLVASV	Q14919
						RLDDNIRTV	Q5VIR6
						RLPDDDPTAV	Q9UBF2
						KVFGNEIKL	P19338
						SLYSQVHQI	Q93074
						ILLPEPSIRSV	P25098
						FLNKEILEL	Q9UPU7
						KLNEMSYEL	Q5VU43
						YLANGQTKV	Q9H3M7
						FLDEPTNHL	Q9UG63
						SMYGVDLHKA	P11171
						KLISELQKL	Q5UIP0
						GLYGAIFRL	O95977
						KVAPAPAVV	P62424
						ALFEGKVQL	Q8NEZ3
						SLIKQIPRI	P62906
						TLDEKIEKV	Q96GQ7
						SLLSHVEQL	Q9UI95
						ALNSKILSV	Q96NW4
						YVVPFVAKV	A5YKK6
						KLHGVNINV	Q9BQ04
						GNFGGRSSGP	Q32P51
						ALYHLAIKL	Q9UKA4
						TVLEKVYEL	P78527
						RMLPHAPGV	Q13547
						RLQESVMEA	O60216
						ALLQQVHSA	Q86XN7
						KLFEDELTL	O95202
						WLEENVHEV	Q9BQ70
						ALYASRLYL	Q96IJ6
						SLADIAQKL	O43242
						AmIELVERL	Q96DX7
						KMAEMLVEL	Q96HT8
						ILTESEIKL	Q99598
						SLDKFLASV	P69905
						ALQEmVHQV	Q14511
						GVYGGSVHEA	Q96KP4
						ALAEALKEV	Q6PI26
						KLIDRTESL	P33241
						GLATDVQTV	P49720
						SLIDKTTAA	P09234
						SLATSLPRL	O43156
						LENDIKVEI	P54289
						ALLSGLREA	O60341
						VLADQEVRL	O43566
						ILDDIGHGV	Q9NYB9
						SLAKIYTEA	Q92522
						MLPPPPLTA	P18858
						RLAETQEEI	Q9Y383
						SLLESVQKL	Q13535
						LLGPPPVGV	Q9ULV3
						ALLERGYSL	P34897
						VIDGHIYAV	Q14145
						FLDNERHEV	Q16512
						VLIPKLPQL	Q8N138
						ALLDSAHLL	O14617
						GLIEILKKV	O14737
						RmLDSVEKL	P55160
						SLAEGRLYL	Q7Z3E5
						RLDELGGVYL	P04844
						FLLEKGYEV	O60547
						QLENLQKTI	Q99766
						VLYSIAEKV	P83876
						VLLDHLSLA	P29459
						TLYEHNNEL	Q9NRG9
						GLKEGIPAL	P13639
						GLQEGTHEL	O76094
						FLQEHNTTL	Q9P219
						IQGGPFEEKI	O14522
						FLSEHPNVTL	Q9UH17
						QLLDFERTL	Q16828
						KLGLKPLEV	O43290
						NMYGKVVTV	O00267
						LLAAWTARA	P05067
						KMWEEAISL	Q92608
						KLLEEQGIFL	Q5T4S7
						LLGPRLVLA	P49755
						mNVAEVDKV	P63220
						RLIDLGVGL	Q9UGL1
						ALDSTNVEA	P62491
						YLTHDSPSV	P09234
						NmYGKVVTV	O00267
						VLFHNLPSL	P19397
						TLLVVVPKL	P21283
						TVSTVGISII	Q9Y4B6
						FLAEHPNVTL	Q8IUX4
						YLGPHIASV	Q96GC9
						RVADVIAQV	O94759
						FLDKLHNEI	Q9NWB7
						AEITDKLGL	P61204
						RLLDSEIKI	P17980
						SLGRFEITV	P53677
						RLLDLENSL	Q7Z7A4
						KIAPNTPQL	P69849
						VLSSRLAFA	P79483
						PGHLQEGF	Q8NC51
						SLFGGSVKL	Q8WUM4
						TTKPSLPAI	Q99677
						AVVSGVLQAL	Q969Y2
						KLNATNIEL	P28066
						AEPAVQRT	P14209
						LLYQGPHNTL	P13612
						KTLEGEFSV	O15391
						SmLEDVQRA	Q9NW13
						SLSTVEDLK	Q99996
						ILQEKLQEI	Q4LE39
						ALLSRLEQI	Q9UKM9
						ELTLPTPAAVAK	O14924
						FLFEPVVKA	Q6IN85
						KmWEEAISL	Q92608
						FIFSDTHEL	Q9UKK3
						PFFLHLIF	P32245
						VLVDRTIYI	P52758
						QEKVIPAL	A0AV02
						YmIAHITGL	P04818
						LLDPSVFHV	Q9BVI4
						SLSGELREV	Q8IX12
						AQYEHDLEV	P62826
						VQDDIKESV	Q5VYK3
						TPSVVEGDNLTI	Q9NY91
						ALSDGVHKI	Q9NVQ4
						SLDTQPKKV	P15923
						SLSDTVEKL	Q14203
						AVIEHLERL	O43716
						RLFSSIVTV	Q9NX74
						GQSELASRLTL	Q9NZD8
						KITTVIQHV	Q9H3R5
						RQPDSGISSI	P04843
						YLDQTLPRA	A8MPP1
						KLVKEVIAV	P38117
						LLIGMmITRA	Q99973
						ILDAGGHNV	Q99460
						ALIEKLVEL	Q14181
						SLLDDLHSA	Q9C0D3
						KLYQTPLEL	P52948
						HLLNESPmL	Q92621
						KVQEQIFNL	Q6IE81
						SLYEENNKL	Q8IWJ2
						EGLKFVEGV	Q9NZ94
						LQYSVEVQV	Q8NDA2
						ILAQEIVKA	Q9UBE0
						TLVEAIKQV	Q9HCE1
						ALLEKGITEA	P41229
						ALRDVSEEL	P40222
						TLNDREYQL	P27708
						RLQDAIAKV	Q69YQ0
						DIGFIKLD	P62273
						ILIRPLVSV	O75027
						KmDEVLYSI	P83876
						RLLGYVATL	O75534
						RLTPKLmEV	O15372
						HLITFETEV	P40763
						LLKELLPVI	P54198
						SmYDKVLmL	Q9Y5Q8
						VILPTVHEV	Q8IWF6
						VmVTNLVEV	O14522
						RLDDAIHVL	P15884
						RLLEGVNQL	Q10570
						ILSESLHSL	O43156
						SMYDKVLmL	Q9Y5Q8
						KLGPEGELL	Q15758
						KLDPTKTTL	Q92597
						RLQGELQAV	Q9BRQ5
						GLFQGKTPL	Q9ULW0
						NQFPGFKEV	P08579
						LENLVQLLN	Q86VV8
						GLLGTLVQL	P35222
						KQISQAYEV	P31689
						QALEELAAK	Q9C0B1
						RLTPKLMEV	O15372
						RLHEKIQEA	O75683
						KLAESVEKA	Q9Y5B9
						KQEYDESGPS	P60709
						ILFRYPLTI	P35219
						MPGLGWVLR	Q8WZA1
						QENEILKQI	O60741
						YLTKEDLRV	P60903
						HIIENIVAV	O76021
						ALSEQILmV	P48552
						ISNEFKVEV	O94985
						PGSLVLIIIL	Q9UHC9
						TLAKADLEAQ	O76014
						GLLEGIRGA	Q9Y3Q8
						KMAEmLVEL	Q96HT8
						FLEKLLPPV	O95372
						TLAEHIIEA	Q9Y6Y1
						ILHDDEVTV	P05386
						NMVAKVDEV	P62906
						TLADIIARL	Q9P2P1
						ALQERLDGL	P55209
						RLAELQEQL	Q15059
						ALSSLIHAL	P13010
						VLmENIVYL	Q9P2J5
						ERLQELEKI	Q13439
						AVLTQIDQI	Q15645
						EEETGEETKL	P55209
						GLLSHSSTL	Q4VCS5
						TLIDLPGITKV	Q9UQ16
						KTIETSPSL	Q9NVI1
						KLAEGVLDV	Q5THK1
						KLMDHIYAV	Q9UP83
						DLQALKESLQ	Q15437
						AVLKEVEQL	A8MXQ7
						KLDKNPNQV	Q9UKL3
						SLFQSRISL	O94868
						VLMDRLPSL	O60287
						VLKEIVERV	Q14444
						LVDESDLYN	Q712K3
						KLQEANAQL	Q15334
						ILDSGIYRI	Q9UPZ3
						SLLQGSPHL	O14753
						SLLPPDALVGL	Q15437
						VLNEQVKEA	P49321
						ALMDQVHHM	Q96BU1
						IGTVLVPILL	Q96RD6
						LETVNAHmmL	Q13156
						AEKVEIATL	P25789
						KMNESTRSV	P33991
						ILDGNQLHI	O75534
						VLLTGLHAV	O60688
						MLLKKGADPT	Q3KP44
						TLLNVIKSV	Q14571
						KVPEIEVTV	P78347
						GLAKAVASV	P57678
						ISLEGAQKL	Q8IYK4
						KLLGELHTL	Q15154
						IMLDNQKLV	Q9Y3B6
						KLQDGVHII	Q9Y3A2
						TLAQRVKEV	Q9Y679
						GLPNRLPPGA	Q92530
						KLYEAVPQL	O00311
						RLLPKVQEV	Q86UD0
						LLQKEQEIL	Q92805
						YLGKIKRV	Q5T6S3
						ALDKALTSV	Q13617
						ILLGKVQQL	Q9UNS2
						KESTLHLVL	P0CG48
						LSLEKNTIV	Q15643
