# Supplementary material for: TAPBPR alters MHC class I peptide presentation by functioning as a peptide exchange catalyst
Source: eLife journal article supplement (doi:10.7554/elife.09617), 2015-10-06
Supplement: supp [file elife_poa_e09617_Figure_6_source_data_2.xlsx]

## Sheet: Sheet1
KBM7			KBM7 Tapasin KO			KBM7 TAPBPR KD
Sequence	Protein Group Accessions		Sequence	Protein Group Accessions		Sequence	Protein Group Accessions
GESDDSILRL	P63220		SLFPGNmETL	Q4G0P3		VDEVGGEALGRL	P68871
VHLTPEEKSAV	P68871		GESSGKNVTL	P36578		AEELLRIGL	P50990
NEFPEPIKL	P51149		FVQmmTAK	P62158		GEITGEVHM	O75369
GELGNGNIKL	P12004		SEAGSHTI	P18463		FADQEVRSL	O00443
SVSTVLTSKYR	P69905		STPGNGATP	Q8N5V2		YEQLLDVKI	Q7Z3Y9
AEITDKLGL	P61204		SEDPSHPSM	Q14839		GEDREATGVLL	O00267
TEVGEKIAL	P41091					GEIVTIAHL	P35606
AEFKEAFQL	P60660					VVVAVGRAL	Q16531
YSDDIPHAL	P60228					RELEETNQKL	Q01850
VLSPADKTNV	P69905					AEIEDIRVL	Q96Q89
AASEAGRAM	Q14320					KEIDEVGDLL	O15270
KEIEDFDSL	P46060					IEVENKEVL	Q460N5
TQAPTKASE	P47914					GEVDVEQHTL	O95067
AETKDLLVA	Q8WYP5					SELMDITKL	O75694
GEVDVEQHTL	O95067					LEIDNSELL	Q4VXU2
KEYVGIVRL	O60832					TEVLESFKL	Q9NVR2
AEELLRIGL	P50990					AEDPLGAIHL	P08567
GEDGSGKTTL	O43237					GESDDSILRL	P63220
NTIDPSHPM	P49588					GEITGEVHm	O75369
VHLTPEEK	P68871					IEVDPDTKEML	P0CW22
FVIETARQL	Q7Z5L9					AEINNIIKI	P11388
GEITGEVHM	O75369					KEFDGKSLVSV	P08238
VLSPADKTNVK	P69905					AEFKEAFQL	P60660
AEFVGVSHL	Q9ULX3					KEIELPSGQL	Q9H0A0
VADTSAKAV	Q99871					GEITGEVRm	P21333
GESSGKNVTL	P36578					AEEDFYEKL	P33993
GEITGEVRm	P21333					KETTYYDVL	P31689
GEITGEVHm	O75369					IEQEIRILL	Q96TA2
KAMEAASSL	O96028					KEIQELEQL	P49454
ITAPPSRVL	O00767					GEITGEVRM	P21333
LVAASQAALGL	P02768					TELEYIHAL	Q96A65
TENNDHINL	P61956					KEVAELTRL	Q01082
YAYDGKDYIAL	P01889					AEATALVHTL	O43824
GEIDGNKVTL	P19338					SEENITIKL	P43246
SPADKTNVK	P69905					SEEPFVVKL	Q9NVH0
GEIGTKTTL	Q9Y265					REIQDDmQTL	A6NHR9
TAASSSSLEK	P60709					YAYDGKDYIAL	P01889
KEPEINTTL	Q8IYU8					GEVTNDFVmL	P39023
AEKVEIATL	P25789					NEFPEPIKL	P51149
SEVmGEPHL	Q9Y244					AEPEADKGTVL	Q8NBS9
AEEDFYEKL	P33993					FEDAAEIRL	P19338
AGKVTKSAQK	P68104					KEIVAEAERL	P55010
SEDGDAHVL	Q8IZL8					KEIEKDLRL	Q2M389
GEFADPFKL	O75694					GNFGGSRNMGGP	P22626
SEAQSGTQL	Q10570					REVWPEGDVF	Q9UNS1
TSGAASAELVI	Q9NUN5					ISEENFRVM	P52732
IEVDPDTKEML	P0CW22					REANQAINPKL	P17844
SEDPSHPSM	Q14839					REDYPQKEIL	Q9ULI2
AEEGGAARL	Q9Y2K7					KEVDEDFDGKL	Q9BUP0
SEVMGEPHL	Q9Y244					SEIQVLEHL	Q9HAZ1
GNPKVKAH	P68871					GEISDIHTKL	Q9UHD2
SEDPSHPSm	Q14839					FAEDSLRVI	O60313
VDDmPNALSAL	P69905					GEPLDNFESL	O75496
KEIYNEKELL	P60228					YEEILNTKL	Q53H80
LADPSAKAV	Q9H2K2					KNLQTVNVDEN	P62899
KEIGELTQL	Q15404					VHLTPEEKSAV	P68871
AEVETGDKL	Q96J01					GKADGAEAKPAE	P35579
VEELGDLAQA	A6NDU8					AEDPALKEIVL	Q9H3R5
VSQVGKEL	Q9NX09					REDDFNNRL	Q9H078
AEDKDTPAL	Q7Z6Z7					YEALPELKL	P06737
KEEQEVAmL	Q01629					REVENPQNQL	O43556
LmLVDPLIR	Q9P0T7					KEIFLRELI	P07900;P14625;P08238
IAISRTPVL	Q9H3K2					YEIDDVERL	Q9ULI4
KEVADAIRL	Q9BRK5					WEEERQPIL	Q15021
TPEEKSAVT	P68871					KEKYIDQEEL	P07900;P08238
RNETQVDGAR	Q9NYQ6					KEIYNEKELL	P60228
SIQFAEmKL	P24821					KENDFDRLVL	O14579
NTIDPSHPm	P49588					KEYSDDKVQL	Q8WYH8
TPEEKSAV	P68871					AAMKALQAL	Q9NUL3
SEAGSHTI	P01889					SEISSATKL	P46100
AASAAEAGIAT	P55036					VTVPPGPSL	A2A3N6
KESTLHLVL	P0CG48					KELADLARL	O15417
GEIVTIAHL	P35606					GEVADTTKL	Q7Z3T8
KETSTEAL	Q86YP4					KEIEDFDSL	P46060
KNTEDSLLV	Q9UQP3					AEIAEIARL	Q9Y4F5
REVVETPLL	P35998					AEFKEAFSL	P62158
PEQNTLPA	Q96L73					AEASMISKL	Q13616
VSKVLENA	Q8NF91					AEIRHVLVTL	P60660
AAAAAGTPRL	Q5BJH7					GEVLIDTHL	Q9NP50
KAVNPGRSL	Q9NZS9					GEYQSPINL	P35219
TETQEKNTL	P63313					FNDPNAKEM	Q96KR1
SESDKTAVL	O75410					SELDLISRL	P11586
ITAKVATHL	Q92752					RELGFSSNLL	O60613
LSLTEGLGLG	Q86SM8					REPDQTFSL	Q9GZP4
LSITENGLI	Q9H267					YEDIAVKL	O15294
MSKASPSSL	Q12767					REIDGGLETL	P38117
FAEGQGRAL	Q92508					FAALHGPAL	Q14166
EGSGSPVRPPV	Q9NUB4					IVIDPKNPL	P30260
						KEVDNFVDKL	P48444
						GEFQELMKL	Q9NPJ6
						LESEDEVKL	P31943
						KEFETAETLL	O15514
						KEILSLDKL	Q16589
						VEDRSGILTL	A3KN83
						KELESVGIRL	P55039
						GEVTDFLRL	Q7KZ85
						GELIEVVHL	O95848
						REMENYEKI	Q6I9Y2
						REVKEENTL	P48995
						FGIDRPAEL	Q8IWZ8
						FAGDDAPRA	P60709
						FVIETARQL	Q7Z5L9
						RETVSEESNVL	P13639
						YSDDIPHAL	P60228
						TEAEIDIRL	Q7Z3U7
						REVEIQSHL	O14965
						LAYDRMPTL	Q15049
						REIEIQAHL	Q9UQB9
						REIAEVNKKL	Q96HR3
						SEILETSSTKL	Q6W2J9
						NEIVTIERL	Q06787
						KEAAEQDVEKK	P26373
						ISEENFRVm	P52732
						KEAEKSPQL	Q9P2S5
						REMEEEAEKL	Q86U42
						REIQDDMQTL	A6NHR9
						KEEETLLRL	O75971
						KEISFAYEVL	O60884
						KEIDKEEHL	Q9Y5V3
						GEYEKGVDHL	Q15388
						KEVQDGIEL	O75534
						KEIIQDVTL	Q9Y265
						AAVPRAAFL	P30040
						YANSKAVTL	Q6UXN9
						GELGNGNIKL	P12004
						IEQLKDVTI	Q8NB90
						GEVKDFPDL	Q9UJY4
						KEDGAISTIVL	P50990
						AEGEIYTKL	Q8TAG9
						YEDQTKPVL	Q9UIJ7
						KEILDTAL	O15270
						AAEEGLREL	O43293
						MANGAVIHL	Q15459
						AENEAETKL	P07814
						AEVETGDKL	Q96J01
						FNDPNAKEm	Q96KR1
						VEDVSWHLL	Q09028
						PEPAKSAPAPK	O60814
						VEIEERGVKL	Q15019
						KEEQEVAmL	Q01629
						FAEGFVRAL	P05412
						YESPGKIFL	Q6P0N0
						HEVMEQQTI	P33993;P33991
						YADVGGKQF	P51571
						GEIQEIVKTGL	P35606
						HENEDIYKL	O00505
						SAIDRIFTL	Q86TU7
						IEYQFVERL	O00463
						KELPSDFQL	Q9NR09
						NEVFNDVRL	P47755
						TEDITRYFL	O43491
						LEFDEKAVL	Q9P2J5
						TEDDEYVRL	Q8N2A8
						RDGQVINETSQ	P08670
						GEEKDINTFL	P46013
						KEFDGTKVFL	Q8TEA1
						IEMNEPVQL	P12004
						AEVSELETRL	Q15027
						TEDITRYYL	P11171
						LEIQDKEYL	P42356
						FEEAERTYL	Q9P2L0
						RETDLQELF	O75821
						REMNTEAEKL	Q5TKA1
						REKDDDVVSL	Q7Z628
						KEIESRVVF	Q76I76
						REmEEEAEKL	Q86U42
						GEIKNIHLNL	Q9Y5S9
						KEDEDDKTVL	P14625
						SEWNTVERL	O00541
						KEQDIYTHL	Q96SN8
						AEQKVEYTL	Q04637
						GEDLEKVTL	Q9NQC1
						LAVHPSGVAL	P05161
						AEFVGVSHL	Q9ULX3
						KEIEDAAQF	P08559
						SAIASTKVM	Q9NVT9
						GEVDPKVAL	P17568
						AEITDKLGL	P61204
						IAISRTPVL	Q9H3K2
						GGSDGYGSGRGF	P22626
						GGNFGGRSSGP	Q32P51
						AEIKDGERL	P35606
						TEDHVMHLL	P04233
						AEAVQKFFL	Q15388
						REMENKETL	Q13233
						AEFPLDPQL	O43143
						IEFVADRL	Q7LG56
						DLLSGSLEVI	P22736
						VEESGEHVIL	Q15029
						TEAEIDAHL	P60900
						YSLDHISSL	Q12769
						YSYFSPRTM	Q15003
						VAIKAGTTL	Q5BJD5
						KEFGTNIKL	P14625
						VGDPGQRTL	O14497
						LALLLQAKL	Q13505
						KENKGEERL	P52789
						YEDATKITV	P27694
						VAEENTRVL	Q9Y5T5
						GEIREQNGDSL	P22695
						GDSRGGGGNFGP	P22626
						REHEEYLKL	Q96HY6
						GENEDLLKL	O75940
						SEDEVKLAL	P31943
						SEVIFGHVL	Q9BWD1
						GEQYDQAKL	A5YKK6
						LANPHELSL	Q5TDH0
						IEQSTGIRL	Q99707
						KELEEEITL	O75116
						DQLEELEKI	O60393
						SEDDVKmAL	P52597
						GELLMHPVL	Q9UNM6
						KEVADAIRL	Q9BRK5
						SEIKGEVLYL	Q13438
						FEHPNVVRL	P11802
						RELNEALEL	P04637
						SEDPGTKVLL	Q5TA45
						IESSDVIRL	Q2TAY7
						FAIDPHLLL	Q29RF7
						FTDAGLKEL	Q9Y6E2
						RELEKLFQL	O95997
						KGGDAPAAGEDA	P62851
						ANVGAGKKPKE	P62847
						GEGPLDVRL	Q9Y608
						REVDPNEQL	Q16514
						KEYVGIVRL	O60832
						QLDEEIKEL	Q9UL68
						LAEAGVRLL	O43175
						KEAAEQDVEKKK	P26373
						GEVQDLLVRL	Q9UIF9
						GELFSSPHL	Q99871
						GELKIAYQL	P35606
						LEEIYAPKL	O96020
						NEEDSKIEL	P42167
						ISLKEIQVL	O43439
						GEVVGKFYL	P52888
						REIMGTPEYL	O94768
						AESEDGKLTL	Q8IZX4
						KEIDIYANL	Q6PH81
						HEVmEQQTI	P33993;P33991
						IEDIPKEVL	Q86WR0
						LEVEDRTSL	Q8IX90
						GEFNEQVLRL	Q9H0K1
						REPVQLETL	P62314
						KEITQEMQTL	Q96JI7
						IEQEKQAGES	P62328
						KENLELNGSIL	O43663
						IMREDDIKI	Q9HCK1
						RLNNITIIGP	Q9NUM4
						REVIQSDSL	Q15084
						KELPEYYEL	P51531
						HEAEEGSKL	Q9P2M4
						REIAEAYETL	Q9UBS3
						RENPLELRL	Q9BRR9
						REWTEQETL	Q92922
						KEIESTKGEL	Q96EA4
						REDmIDIKL	P20340
						KEDFEKVIL	P07814
						KQEYDESGPS	P60709
						REQEEIVRL	Q9NZM3
						KETDVVLKV	Q02952
						KEIEQEAAVEL	P47985
						YQIPRTFTL	Q9UQC2
						YENYEQIKL	P53804
						REVSEEHNL	P49005
						REVEARYAL	P05783
						KETSPLTAEKL	P30279
						KEVFDVSKL	Q13206
						REAPERPSL	Q9NXX6
						KEDESTEKL	Q9NS91
						REEPDLVLL	O00255
						READFKETL	Q96Q89
						KEVEAVVYL	Q9BZG8
						FAYDGKDYI	P18463
						GEIDGNKVTL	P19338
						SEVMGEPHL	Q9Y244
						REESESVLTL	Q08209
						KETAVFINI	Q9UBQ7
						KETIEIIDL	Q7Z4S6
						KEIGELTQL	Q15404
						KEVDVSKQL	Q9Y448
						LSLAENALK	Q86W28
						FSDPVYKEI	Q8IV48
						SAMSNPRAM	Q9UMX0
						FANNVQLSL	O15503
						QREEAAEVASL	Q9BW71
						RAINIALQL	O75817
						GEEGDLKTSL	O75164
						TEVGEKIAL	P41091
						IAAPFTSKL	Q9HD20
						REVQTNDL	P61247
						REHEPPGAL	Q86YC3
						GEFADPFKL	O75694
						SEEETRVVF	Q14680
						REIEATNAVL	A6NKT7
						REGQEDQGL	P26599
						IESPLFLKL	Q7L5N1
						VEVSIPAKL	Q00341
						GESHVSGTTTL	Q9UPT9
						AEIDSIHQL	Q9P2W9
						SEVQDRVmL	P62699
						GNFGGSRNmGGP	P22626
						KEIEEYELL	Q8NB49
						REEDEETQL	Q14331
						SEDPSHPSm	Q14839
						FAYTARISV	Q8IXQ5
						REIVISERL	P13611
						KELEEELKL	Q8N5H7
						FEFPNKVVL	Q8WV83
						IAQDHRSSL	O15013
						KEIYDDLQAL	Q9NYH9
						KEEHLYILI	Q9Y5V3
						REAEAAIYHL	P14618
						REAQVFVRL	Q70J99
						KEISDLHYL	Q6ZMZ0
						REEGFDRSTSL	Q9NX09
						KEKYPDAVYL	Q6IPU0
						AEDKDTPAL	Q7Z6Z7
						TESDTAVRL	Q13464
						GEFSDKLLSL	Q12899
						KEIQSSNL	Q9NX55
						KEVDALLHL	Q9BW19
						GEVPFNHEIL	Q7L5N1
						KEDPNTALKL	Q96D09
						REQDEAYRL	Q9UNN5
						RESNEVVHL	Q9H992
						AEALATHIL	Q9UKA4
						GEDEPLHAL	Q15637
						IEmNEPVQL	P12004
						FQNPFRSEL	P18887
						REVQAEIGKL	O75150
						IEVDPDTKE	P0CW22
						RENVAVAKL	Q6IQ49
						FVQPHIIQL	O15394
						GEKLPDVVL	O15318
						NLSKEDDVR	P62753
						KEEPSNNVKL	Q14974
						FAMDVYKNL	P60228
						RESELRTVL	Q6ZRQ5
						FIISRTQAL	Q92973
						YAYTGRLEL	Q96PQ7
						MELLDGKQTL	Q15021
						SEDPEKYFL	Q9UKP4
						GEIEGLNDTF	Q9BTT0
						KEILETIQL	Q13608
						RESLPIYKL	Q14562
						KEINEKSNIL	Q9NTJ3
						SEVSTVLKL	Q16512
						KEVAGLVTL	Q9Y3B7
						FVDEGIKTL	P06746
						AEVDKVARL	Q9UNK9
						QNRVDLAQI	P0CW27
						REEPEKIIL	Q12802
						FAHTNVESL	P30101
						TEIEGTQKL	Q14289
						AETEEIKTIL	P46020
						MAHMASKE	P04406
						GELQESQSRL	Q9Y6K9
						TENNDHINL	P61956
						YEIHDGMNL	Q9BZL1
						REATTLANGVL	Q8WUM4
						KELSDSVTL	O75694
						KEPDALTLL	Q16665
						KEVEEISLL	O00567
						REHVEAIKI	O95229
						KEVNFTSEL	Q9ULW0
						REAQVNVRM	Q9Y2W1
						TEDPEKQTL	Q6XQN6
						KEAPEGTFL	O14508
						KEVTAIETKL	Q14683
						REDNQTNRL	P63092
						KEIEDRQKL	Q9NQZ2
						IEGPIIKL	A6NHR9
						KEVEELEQL	Q15942
						AEIEEREAL	Q06547
						SAIGYIHSL	Q13042
						KEDSDEVHL	P33241
						REVEGLKDLL	Q92974
						FAEGQGRAL	Q92508
						REVLPSTRL	Q7KZF4
						REEPSNPFL	Q7LBC6
						RLQMDEELR	Q14687
						AENGLTVRL	Q12789
						GEARVGSEL	Q12789
						AEAGAEARL	Q14160
						KEIQWETRL	Q96SU4
						AENKDEIAL	P13010
						GEFGKKADGLL	Q8N766
						AAVDRTTEL	Q8TD16
						KENATVAHL	Q13158
						REGFFTNGL	P35080
						KEIKEVIEL	P62195
						YVFDGKPPQL	P39748
						YADPTKRLEL	Q9Y5Q8
						REVVETPLL	P35998
						REMLSSEIR	Q9HCM1
						AEEGGAARL	Q9Y2K7
						VGDPSVHLL	Q6PCT2
						KEVSSATNAL	P09012
						MAALQAKAL	Q7L4I2
						TPEEKSAVTAL	P68871
						EKILDKLEL	Q8TDI0
						YIHVGAQL	O94832
						SEFKGDLETL	O75534
						KESQVLLTL	Q9UJW0
						IAYPRAVTL	P48029
						GEVLEKSLL	Q96M27
						GEDNGQRGYLL	O00116
						TETQEKNTL	P63313
						KESEDKPEI	P07900
						REGEIAQFL	O00170
						LSIAESRPL	Q9UN74
						KEGFPITAI	Q9NYV4
						SEIDESVKL	Q9Y2I1
						AAmKALQAL	Q9NUL3
						EVVVPTGAAGN	Q86YJ6
						LIVEPSREL	Q92499
						REIEGDLLL	O43709
						REGPFYPTL	Q9ULC4
						HASDRIIAL	P29401
						TEVADHIQL	P36406
						KEIDTSTKV	P06400
						KEIDKNDHL	Q9UNF1
						GNFGGSRNM	P22626
						NTIDPSHPm	P49588
						SELASRLTL	Q9NZD8
						SEDKGALAKL	P62424
						LADHTVHVL	Q3KRB8
						IADPFFRSA	P78410
						KEGPEGANL	Q92879
						SEFAKDPSL	O43663
						SEVQDRVML	P62699
						GETAFAFHL	Q9BQ83
						REVVNKDVL	P33993
						TEAAHPIRL	Q6P2Q9
						AEVDTRESL	O60306
						NTIDPSHPM	P49588
						GEESRSPSL	Q8TE76
						KEIAEAYDVL	P25685
						SEDPSHPSM	Q14839
						SEAKGLVTL	P08243
						RELPGHTGYL	P62879
						EIQRDMDQTL	Q6ZMY3
						RALDHYLTL	Q9BWG6
						KEVNETYKL	Q460N5
						MADPNIRFL	Q86WV6
						KEPAFEDITL	O75400
						REYEPDHNL	Q6P1L6
						HEFSREPSL	Q9H063
						RTGNPTGTYQNG	P17844
						KETPDKVEL	Q13610
						KEIEELKELL	P49321
						RELDIYNNL	P20749
						SEPEIEIKL	P26358
						GEDSSFLVVRL	Q99567
						KESEVFYEL	Q16665
						KAHLGTAL	P62266
						REIEGDLL	O43709
						AEKVEIATL	P25789
						AEHIESRTL	Q99541
						KEEQEVAML	Q01629
						TIEQEKQAGES	P62328
						REVDEQHQL	Q15751
						SEVmGEPHL	Q9Y244
						REIIQKLML	P13797
						KEFGDDKVQL	Q9UNL4
						KELDKFDNL	Q9Y520
						IIITPTREL	Q8NHQ9
						KEAEFLQKL	A2A3N6
						AEEVGVEHL	P51665
						GEQREPETL	Q5W0V3
						LEVISGERL	Q01082
						GEDYEKVKL	O95926
						AEYTAKIAL	P15311
						GESSGKNVTL	P36578
						KESDNNVKL	P53618
						REYEKQVVL	Q658Y4
						FTEAGLKEL	Q7L1Q6
						KEMEDTQRL	Q8IX21
						IEPADAHVL	Q9GZZ1
						LEQQNKILL	P08670
						LEENVHEVL	Q9BQ70
						KEISNNDKL	O60934
						GEKVSAYVL	Q9UL42
						YAFPKAVSV	O15427
						SELmDITKL	O75694
						KEIEAMHSL	P29375
						REELSNVL	P0C6E6
						YAEVGRVL	Q8IWZ3
						GEEKEAATL	P51858
						REMEEKVTL	Q8TD19
						EEVQEFHQL	Q12768
						GELSLPVHL	Q9NSG2
						VFVDRTLDL	Q8WU76
						KESEEKEVL	Q6IN85
						LADPSAKAV	Q9H2K2
						QELDLTATHL	Q99467
						AELKEKIVL	O43482
						GEVEGRAGL	Q9C0G0
						KETEDINTL	Q9UHL9
						YQEKGVRVL	P61160
						AESDTDVKL	Q6IQ23
						KEAERDVSL	P57678
						YEEQNQATI	Q14524
						KEISTEEQL	P98170
						AEAPSQVRL	Q9P2E5
						GENGIHFLL	Q12849
						TETQAEKVVL	Q9HD26
						GESDDSILR	P63220
						SEIPDEVKL	Q9UEW8
						LATRAIPEL	P35222
						GEVDDGARKL	P53582
						HAVFPTSSm	P35612
						KESVSHAIL	Q96PP8
						KEAAYQERL	P49756
						KEVATDVRL	O75534
						KEESQQmVL	Q14152
						FTADVRSVL	O95476
						VAAPPPKNSF	O15357
						GEFEKIMQL	Q17R31
						REVSEEHNLL	P49005
						EDPFEKPLI	Q68CR7
						KELENANDLL	P12270
						VLSPADKTNVK	P69905
						KEVANSTANL	Q9Y490
						GETQDFHSL	Q8TAT6
						GEVKGTSGSL	Q9P265
						AEYGGHQRL	Q04446
						KESTLHLVL	P62987
						LADDSVRSL	Q4J6C6
						RELQSKEFL	Q8NBI5
						GEFQIVNPHL	P23921
						AEAHARIHL	P49736
						AEISKYLTL	Q96KC2
						KEVGEAFTIL	Q99615
						AETRESTQL	Q08J23
						HELDQGQQL	Q7KZ85
						REKDLEVYL	Q9Y2I1
						AEVEKQTSL	O76031
						REEGTPLTL	Q9Y3T9
						KAMEAASSL	O96028
						KQKELEDKEKQ	Q96JM4
						RELEEKEQERL	Q9Y496
						SEAGSRIVL	Q9BRR6
						YEEEQFTVL	Q9Y4W2
						LAYDRmPTL	Q15049
						RESDAGTYVF	Q96PQ1
						DDGGKEKMVL	P28715
						VLSPADKTNV	P69905
						EAAQERAL	Q96B70
						SEQRLLIVL	Q96KP1
						GEDGSGKTTL	O43237
						IIEPSLRQL	P62987
						FEDVGRQVL	Q10713
						AEVKERVTL	Q13144
						AETKDLLVA	Q8WYP5
						KEVATVTKL	Q9NVU0
						REAMNDPLL	O43143
						TEIEDSHTL	Q969Z0
						KEVGEVSVL	Q8IZV5
						REHVEAIKIGL	O95229
						GEVGSEVHL	Q9HAW4
						GESTDALKL	P49662
						KELEANVL	Q9NTJ3
						REAQMAAKL	P16949
						AEHRTPDVL	P31948
						GEIRTITVV	Q9NW64
						REIQTAVRLL	O60814
						REIEGSQVTF	Q01459
						VHLTPEEK	P68871
						TEETTHVVm	P38398
						IDGDEKNLMR	Q6UX04
						REPSNPERL	P23588
						YEETRQEVL	O75410
						RELDVSYVL	P46977
						TEEGQKIVL	Q08257
						DDGGKEKmVL	P28715
						KEFDNGHLLL	Q9Y4E5
						RETVNVITL	Q99816
						LAEAGGRAL	Q9UQ90
						KELHEKFDRL	Q14141
						AEEPSPQAARL	O14508
						TEGEDKITL	Q00341
						GEAHLKTIL	Q9Y315
						SENEAGKAVL	P49321
						SEDVHVHSL	O14734
						GNFGGRSSGP	Q32P51
						SEDGDAHVL	Q8IZL8
						SEDPVAIKI	Q14694
						LEKAENQVL	P51572
						AEIKDIGHL	A6NIN4
						KIYEGQVEV	P46777
						LEVSDDPQVL	Q9UI12
						AEVEAQKAQQL	Q9ULW0
						EIKDLEEQL	Q7Z7A1
						KELADESQTL	Q9UNZ2
						SEVKEDVVL	O43303
						VEIAEKNVL	Q99996
						KESLDVSRL	Q32P28
						REYEDGPLSL	Q96AV8
						REAYPEEAYI	P53396
						NSDPNLHLL	Q96TA1
						KESAAHDYTL	Q06124
						AEKAYHEQL	P68366
						REEQKDFVSL	O15270
						AELESKTNTL	Q53EZ4
						KEKEPDYVL	Q9NUL3
						KEVVGKDLL	P53004
						GETEESEKL	Q15648
						AEAKEKIYL	Q9P2J5
						GETGIGKSTL	Q14141
						KEPEINTTL	Q8IYU8
						AAYLRALSL	O15294
						RVAPEEHPV	P60709
						RELQGETKL	Q9NR81
						GEIQAGAKL	Q13409
						TIIGHIASL	P54707
						VLSPADKTNVKA	P69905
						SETKDVFQL	Q9BWT6
						YQIAVTKVL	Q14683
						FANSRDTSF	P49327
						IADSGLKIL	Q9P2R7
						YGTRYGASL	P61513
						GELGGRLDL	Q9Y6C2
						HEDKIRVVL	Q9H4M9
						NADPIAKYL	Q7Z7L1
						STIDKVSVL	P13674
						GEEEFAGAKL	Q8N163
						LTDPDIHVL	Q9Y4E6
						QEDLPFLLK	Q9NRJ7
						AEVGDGTTSVTL	Q99832
						REPESEGIKL	Q96T21
						SEAQSGTQL	Q10570
						REPGAYIFL	Q9BT22
						SEAEIRVFL	Q13487
						RESPLQFSL	Q8TEU7
						HEGGPDSKL	Q3T8J9
						KEAGNINTSL	O95235
						KEEEPSVKL	Q9BY43
						KELVEKLLE	Q96G28
						VTDHNLHEL	Q9NV31
						DTVSRSSLE	Q14524
						RELEGTLRL	Q9NRC6
						SILTTHTTL	P68366
						KEVPDGENL	Q8NEB9
						IESNHPIVL	O00410
						REVEENGIVL	Q9Y5P4
						RELAGHTGYL	P62873
						MTPTRFAEI	P28838
						SEKVDRAVL	Q96CV9
						VETVYTHVL	P04843
						KEQTVQYIL	Q9UI12
						REAPNPIHL	O00303
						GEMKGAIGL	O75563
						GEMKAEVTKL	Q96SN8
						YAKDDPLEF	P06756
						KEHQEFLTKL	P49454
						LEADVNIKL	P61011
						ELTDKLLIF	Q12981
						NVLDHFSEL	O75153
						GEINTSAKL	P10586
						AAEKGVRTL	O60664
						VEDITPPRL	Q9BSJ2
						RESEAGVGL	Q9BWW8
						IEEKGAVEAL	Q9NR30
						KEIDEVGD	O15270
						AEFRDYPPVL	Q7KZ85
						SETTERTVL	Q9UK61
						SIIGSARSL	Q9Y3B7
						MRDEKLVTL	Q9UKX3
						LEAAGIGKL	Q8IWZ3
						GEIKEPLEI	Q709C8
						GEGDSVITQVL	O75475
						AKEAAEQDVEKK	P26373
						VAIIARTDL	P12268
						FAVAPNQNL	P12110
						AEYKEEELL	Q01826
						KEFNEDGAL	O60506
						YWQNHPEL	Q9UKF6
						FAHPYQYEL	Q01780
						YVDPVNKVL	O15530
						RELYANVVL	Q96T88
						NEISIYDKL	Q6UWU4
						RELSPDIAHL	Q8N1G4
						VANGRIQSL	Q86TI0
						KEYEGKWLL	O94782
						SEDGDAHVLL	Q8IZL8
						FEAPDQKTL	Q9Y520
						RENGQEILL	O14647
						REKENVTVL	Q86XI2
						LEAFGDVKL	Q01581
						YEERSTTTI	Q9P0T7
						REEIAEYQL	P49454
						KETDLLILF	P05455
						ImSDPAmRLI	P31948
						LEQEAENKK	Q9P2M7
						AAVNHISQL	Q5T2E6
						QDEDSEKIL	O95672
						IAIIPSKKL	P0CW22
						RESKSFNVL	P48552
						REIQTAVRL	O60814
						LAVDKSASL	Q96T58
						REFQNPPQL	O75143
						RELYESARI	Q99956
						VSQVGKEL	Q9NX09
						SEVGTDHKL	Q9UK61
						YTYTSKAL	Q8WZ60
						KLLEPVLLL	P62249
						FEDHNPPQL	P60484
						ETGFYVSKAL	Q76MJ5
						HESGASIKI	P61978
						KEFDGKSLV	P08238
						KEEHEVAVL	P13164
						KELDGHVL	Q8TB72
						HEAERTEVL	Q8N137
						QLEQEKQLL	P78344
						KEAPPPVLL	P48634
						GEIKHVSSL	Q5M775
						HAVHVALVL	Q8N1F7
						GEAGSITHL	Q01432
						EIYSINYEL	Q5U623
						YEIHDGmNL	Q9BZL1
						GESGGSMHTAL	Q00013
						REImGTPEYL	O94768
						RETQAINSSL	Q9BW19
						TETNVYFKL	Q9NQ55
						FAKPENIDL	P37268
						LDDGNQmLLR	Q8NCM8
						SEEGLRNAL	Q9GZT3
						DASLPLRL	Q1AE95
						LAVEKAAEL	O75717
						REAEHGYASL	Q9BW11
						REMKDLKEKM	Q14683
						AEIAEKETL	Q0VDD8
						LQKEQEILQ	Q92805
						GFDRSTSL	Q9NX09
						HEEIIKVYL	Q9NNX1
						AEAHAKVRL	P33991
						REVEDDLGL	Q6UWJ1
						LAYLRLNTL	P06400
						GGSFGGRSSGSP	P51991
						SEMIDKLTL	P36542
						HEVKEAQTL	Q9UPN3
						REQNVLHML	Q9NRZ9
						ELVKDNELL	Q15025
						SEDASIHRL	Q92620
						KEEIGNVQL	Q86UP2
						AEHLEKSSL	Q5UIP0
						QNVEATVL	Q8NE31
						FADGHVLEL	Q9Y2I1
						KEAPEEAQL	Q9HBR0
						TAIRSGLEL	Q29RF7
						GEYKKDELL	Q9H2K2
						EKIGLPIIL	Q5JXX7
						MVPKMLVDL	Q8NGE5
						VEDDARGTVVL	P26010
						HEQKEQISL	Q9Y5P8
						KEIVTLDKL	Q5R3F8
						SLADLSLLLF	Q8TDV0
						GEEQNRVQL	Q9P2D3
						VSDFGGRSL	P27694
						SEFEARVISL	Q9UIG0
						GEADAQNITVL	Q15751
						SEDAEKKVL	P16989
						RELDATATVL	Q13948
						LQImCELNV	P09884
						KEAENPREVL	Q15459
						RQGILALQL	Q5T011
						DIKAVSISPTN	Q12913
						KEHEVTIFV	P53396
						YEDPQHHPL	P61962
						SEILDGNQL	O75534
						AELKQAQTL	Q9H0A8
						AEDRPSEQL	Q8WUI4
						KEVEGQSQGSVL	Q9H4D5
						AELEDQNKL	O94964
						KEAEGAEWL	Q6IA86
						KEDNIGNQL	O15226
						VELEAKEVL	Q86UP2
						IKNDGLDIQL	Q9NSV4
						LSEEEAAEVL	Q8WYP3
						RETDDTLVL	Q16531
						RENELSAGL	O75496
						SENKAQVSL	P46939
						GEDTPVTKL	Q6IQ26
						VEDRTSLVL	Q8IX90
						PKASQKKLMI	O60832
						KEFEDKKVEL	Q9H7L9
						ADFAKVLEL	O00170
						PVGFVENGILL	P04201
						KEYEEDDIL	Q96RS0
						SETTAAHSL	Q9HC98
						VSEENQKQ	A4D1F6
						SILRVEAVD	O94985
						REDLESSGL	Q9UK76
						RDPGNLGTI	Q9HC36
						KEILLTTQL	Q1A5X7
						YAVEGRDLTL	P43308
						KDLVDDFRI	Q6NUQ1
						KAFSQSSSL	Q8N3J9
						LIIEFLFL	O75712
						FENEIILKL	Q92608
						GESVTKLTL	Q9UNY4
						GEIKEDTSF	P38398
						QLNSEELPD	Q7Z3E5
						AEEKLPMTL	Q99633
						KENNIMITL	Q9H2G2
						LIYGTPRAA	P10644
						GEPIGRGTKVIL	P08238
						NQTLSFTVL	Q96LA9
						QVTPEGTFI	Q7L5Y6
						LEVLSINNN	Q7L985
						KEAFAKVDL	P13797
						HAVGPSTSL	Q99081
						EAVGREALEL	Q5T4D3
						HETGTKITI	Q9Y6M1
						TAVEAGRAL	Q8IY17
						FASHVSPEV	Q9NP61
						AEPRLPLQL	P14868
						KDLVQQKDI	Q96L93
						GEFQELmKL	Q9NPJ6
						IEDKVKALL	Q92835
						AEIAAKDKL	Q9BVK6
						KLLKACVPGCP	O95248
						MAKAALEAI	P46020
						REEEVSYQL	Q9NV70
						FGGSRNMGGP	P22626
						AEQMPQHTL	Q3L8U1
						IEESGEHII	P13639
						REAELQAVL	Q969Z0
						GESIPIRL	O75436
						MSKASPSSL	Q12767
						YIDEGRLVL	P35610
						REPFPDGAEL	Q6PJ69
						RETEGGTVL	Q9UQE7
						REFQEDPEML	Q8NF50
						REDEKPLVL	Q8WUY8
						KELEENKKL	Q9BXU7
